# Supplementary material
Source: PubMed Central journal article supplement (PMC10984377)
Supplement: jcad062_suppl_supplementary_material.pdf [file jcad062_suppl_supplementary_material.pdf]

SUPPLEMENTARY MATERIAL TO:

Does intergenerational educational mobility vary by sexual identity?

A comparative analysis of five OECD countries

**Contents**

|                                                                                                          |    |
|----------------------------------------------------------------------------------------------------------|----|
| Online Appendix A. Overview of findings from previous research on sexual orientation and education ..... | 2  |
| Online Appendix B. Results using only last available wave with full information for each individual..... | 5  |
| Online Appendix C. Results using logistic regression models and multiple imputation .....                | 7  |
| Online Appendix D. Further considerations on use of sexual-identity questions .....                      | 11 |
| Online Appendix E. Results for other response categories to the sexual-identity question.....            | 13 |
| Online Appendix F. Results using alternative specifications of education .....                           | 16 |
| Online Appendix G. Descriptive statistics stratified by sexual identity.....                             | 22 |
| Online Appendix H. Results using alternative methods.....                                                | 25 |
| Online Appendix I. Additional models explaining educational attainment .....                             | 31 |

Online Appendix A. Overview of findings from previous research on sexual orientation and education

| Study                       | Country       | Data                        | Sample                                                      | Sexual Orientation Measure | Sexual Orientation Categories                                                                                    | Educational Outcome                                                                  | Key Findings                                                                                                                                                                                                                                                                                                           |
|-----------------------------|---------------|-----------------------------|-------------------------------------------------------------|----------------------------|------------------------------------------------------------------------------------------------------------------|--------------------------------------------------------------------------------------|------------------------------------------------------------------------------------------------------------------------------------------------------------------------------------------------------------------------------------------------------------------------------------------------------------------------|
| Mollborn and Everett (2015) | United States | Add Health (Waves I and IV) | middle and high school cohort (grades 7 to 12 in 1994-1995) | self-reported              | completely heterosexual, mostly heterosexual, bisexual, mostly gay (homosexual), or completely gay (homosexual). | educational attainment (high school/GED, college attendance, college completion)     | mostly gay/100% gay/mostly heterosexual men > heterosexual men and women<br>mostly gay/100% gay and bisexual (especially) women < heterosexual/mostly heterosexual men and women<br>bisexual men < heterosexual men and women (but conditional on college enrollment > heterosexual men and mostly heterosexual women) |
| Mittleman (2022)            | United States | HSLs (2009-17)              | high school cohort                                          |                            | “lesbian or gay,” “straight, that is, not lesbian or gay,” “bisexual,” “I don’t know the answer,” and “refused.” | bachelor’s degree enrollment and high-school academic achievement/behavior/attitudes | gay men > straight men and women<br>lesbian and bisexual (especially) women < straight men and women<br>bisexual boys ~ straights boys until high school, but less likely to enroll in college                                                                                                                         |
|                             |               | NHIS (2013 to 2019)         | adult population (25+)                                      | self-reported              |                                                                                                                  | educational attainment (high school, college, professional/graduate)                 | gay men > straight men and women                                                                                                                                                                                                                                                                                       |
|                             |               | NSDUH (2015-19)             | adult population (25+)                                      |                            |                                                                                                                  |                                                                                      | lesbian women > straight women (primarily older cohorts of white lesbian women)                                                                                                                                                                                                                                        |
|                             |               | NCVS (2017-19)              | adult population (25+)                                      |                            |                                                                                                                  |                                                                                      | bisexual men, and especially women < straight men and women                                                                                                                                                                                                                                                            |

|                                          |               |                                          |                                                        |                                                 |                                                                                                 |                                                                                                         |                                                                                                                                                                                                                                                                                                                                                                                                                                               |
|------------------------------------------|---------------|------------------------------------------|--------------------------------------------------------|-------------------------------------------------|-------------------------------------------------------------------------------------------------|---------------------------------------------------------------------------------------------------------|-----------------------------------------------------------------------------------------------------------------------------------------------------------------------------------------------------------------------------------------------------------------------------------------------------------------------------------------------------------------------------------------------------------------------------------------------|
| Verbakel (2013)                          | Netherlands   | Dutch Labor Force Surveys (1994 to 2007) | adult population in coresidential partnerships (25-54) | gender composition of coresidential partnership | men and women in either same-sex or different-sex coresidential partnership                     | occupational status, education field, educational attainment                                            | same-sex partnership men > different-sex partnership men (occ + educ level)<br>same-sex partnership women > different-sex partnership women (occ + educ level)<br>same-sex partnership men + caring field and - technical field (wrt different-sex men)<br>same-sex partnership women + caring field and - general field (wrt different-sex partnership women)                                                                                |
| Pascoe (2007)                            | United States | Ethnography                              | "River High" high school/suburban California           | self-reported, observed behaviors               | gay, lesbian, straight, gender non-conforming, masculine/feminine                               | high school achievement/ behavior/ attitudes                                                            | Ricky (one of the few gay boys at River High) suffers extensive abuse from both peers and educators, and drops out of high school during the ethnography; Rebeca (basketball girls) and Jessie are openly lesbian and enjoy high social status at school both from peers and educators; Genevieve and Lacy (GSA girls) present an ambiguous gender expression and sexuality - they suffer from administrative negligence and peer harassment. |
| Black, Makar, Sanders, and Taylor (2003) | United States | General Social Surveys (1989-96)         | adult population                                       | past sexual behavior                            | gay/bisexual men and women (having at least as many same-sex partners as opposite-sex partners) | focus on earnings, but years of education descriptively reported as well as father's years of education | gay/bisexual men > heterosexual men (years of education)<br>gay/bisexual women > heterosexual women (years of education)<br>gay/bisexual men = heterosexual men (father's years of education)                                                                                                                                                                                                                                                 |

|                                      |               |                                                           |                                                      |                                                 |                                                                                                                                                                                                                                                                                                                                                     |                                                                                                           |                                                                                                                                                                        |
|--------------------------------------|---------------|-----------------------------------------------------------|------------------------------------------------------|-------------------------------------------------|-----------------------------------------------------------------------------------------------------------------------------------------------------------------------------------------------------------------------------------------------------------------------------------------------------------------------------------------------------|-----------------------------------------------------------------------------------------------------------|------------------------------------------------------------------------------------------------------------------------------------------------------------------------|
| Black, Gates, Sanders, Taylor (2000) | United States | 5% and 1% Public Use Microdata Samples of the 1990 census | adult population in coresidential partnerships (18+) | gender composition of coresidential partnership | men and women in either same-sex or different-sex coresidential partnership                                                                                                                                                                                                                                                                         | educational attainment (some high school, high school diploma, some college, college degree, postcollege) | same-sex partnership men > different-sex partnership men (all education levels)<br>same-sex partnership women > different-sex partnership women (all education levels) |
| Gates (2014)                         | United States | Gallup (2014)                                             | adult population (25+)                               | self-reported                                   | lesbian, gay, bisexual, transgender, non-LGB/T                                                                                                                                                                                                                                                                                                      | college degree                                                                                            | LGB people ~ non-LGB                                                                                                                                                   |
|                                      |               | GSS (2008-12)                                             | adult population (25+)                               | self-reported                                   | lesbian, gay, bisexual, non-LGB                                                                                                                                                                                                                                                                                                                     |                                                                                                           | LGB people > non-LGB                                                                                                                                                   |
|                                      |               | NHIS (2013)                                               | adult population (25+)                               | self-reported                                   | lesbian, gay, bisexual, non-LGB                                                                                                                                                                                                                                                                                                                     |                                                                                                           | LGB people > non-LGB                                                                                                                                                   |
|                                      |               | NSFG (2006-10)                                            | adult population (25-44)                             | self-reported                                   | lesbian, gay, bisexual, non-LGB                                                                                                                                                                                                                                                                                                                     |                                                                                                           | LGB people ~ non-LGB                                                                                                                                                   |
| Badgett (1995)                       | United States | GSS (1989-91)                                             |                                                      | past sexual behavior                            | (1) having had one or more same-sex sexual partners ; (2) having had more than one same-sex sexual partner; (3) having had at least as many same-sex sexual partners as opposite- sex sexual partners; and (4) having had either more than one same-sex sexual partner or at least as many same-sex sexual partners as opposite-sex sexual partners | focus on wages, but education years descriptively                                                         | LGB people ~ non-LGB                                                                                                                                                   |

Notes: wrt = with respect to; LGB = lesbian, gay, and bisexual; educ = education; ~ = similar outcome; > = higher outcome; < = lower outcome.

*Online Appendix B.* Results using only last available wave with full information for each individual (this applies to HILDA, SOEP and UK-HLS).

Figure B1. Coefficients of linear probability models based on matched samples explaining mobility among gay/lesbian individuals (Reference category: “heterosexual”)

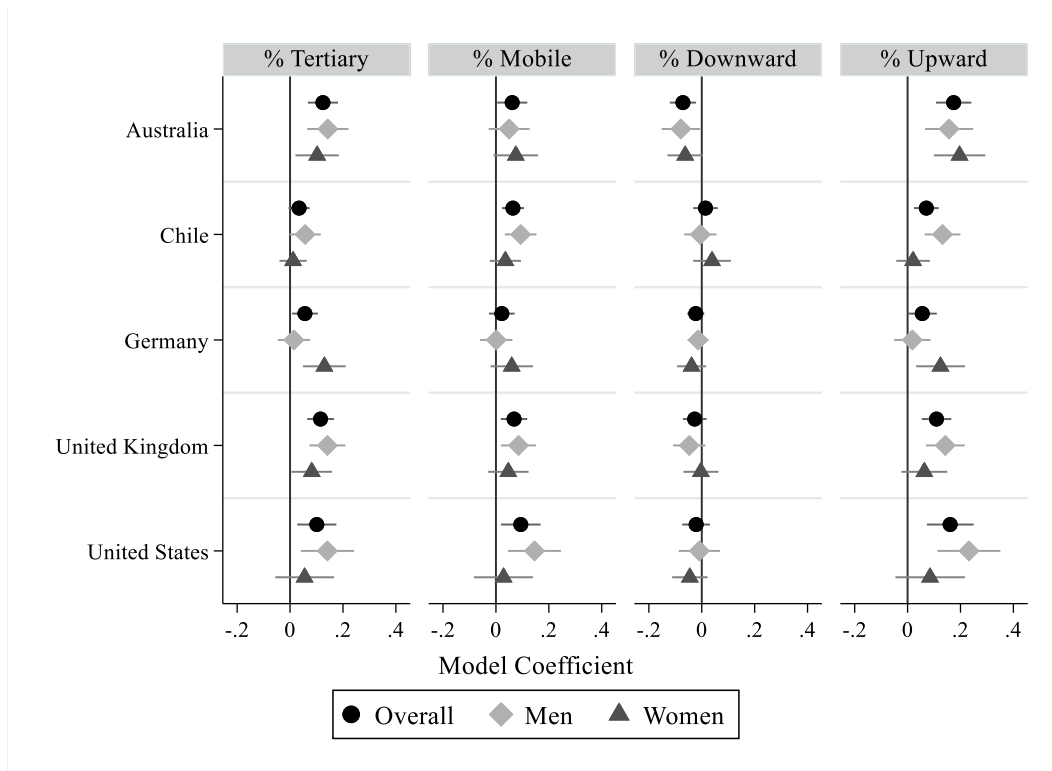

*Notes:* Coefficients from linear probability models (95% confidence intervals) based on CEM. Matching variables: age, ethno-migrant or racial background, parental education, and gender (in the pooled models). Each coefficient comes from a separate model for a specific country and mobility type; for the estimates for men and women separate models by gender are run. Results using only last available wave with full information for each individual (this applies to HILDA, SOEP and UK-HLS; results for CASEN and GSS remain unchanged).

Figure B2. Coefficients of linear probability models based on matched samples explaining mobility among bisexual individuals (Reference category: “heterosexual”)

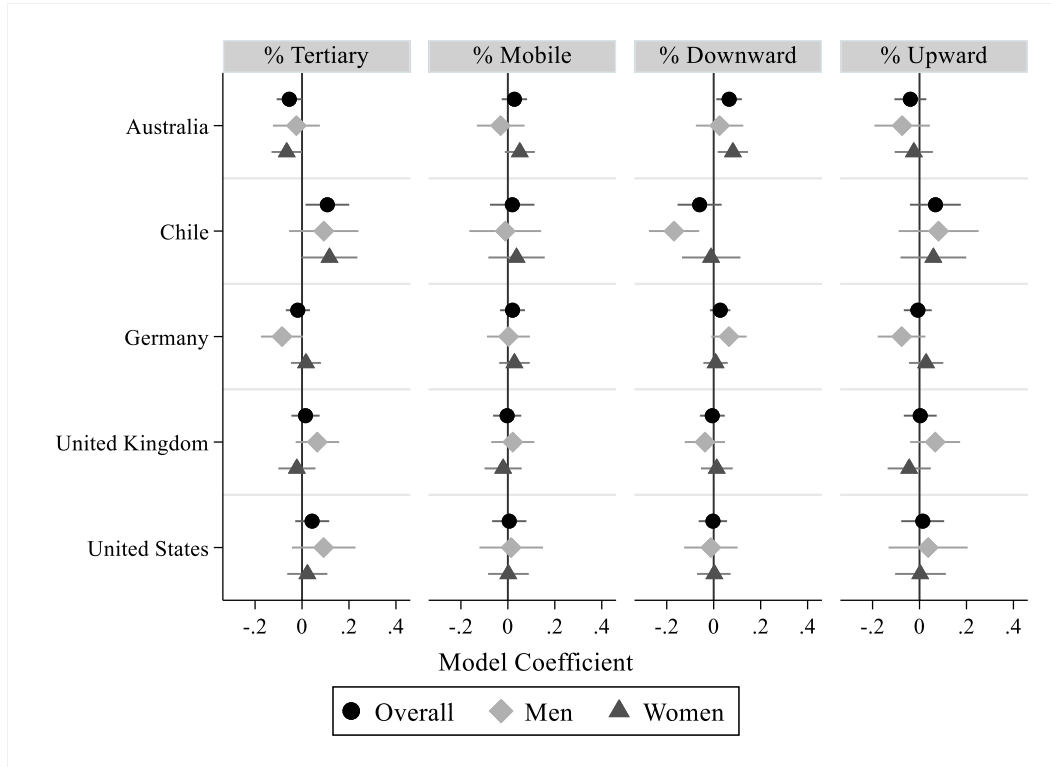

Notes: Coefficients from linear probability models (95% confidence intervals) based on CEM. Matching variables: age, ethno-migrant or racial background, parental education, and gender (in the pooled models). Each coefficient comes from a separate model for a specific country and mobility type; for the estimates for men and women separate models by gender are run. Results using only last available wave with full information for each individual (this applies to HILDA, SOEP and UK-HLS; results for CASEN and GSS remain unchanged).

Online Appendix C. Results using logistic regression models and multiple imputation

**Figure C1.** Odds ratios from logistic regression models based on matched samples explaining mobility among gay/lesbian individuals (Reference category: *Heterosexual*)

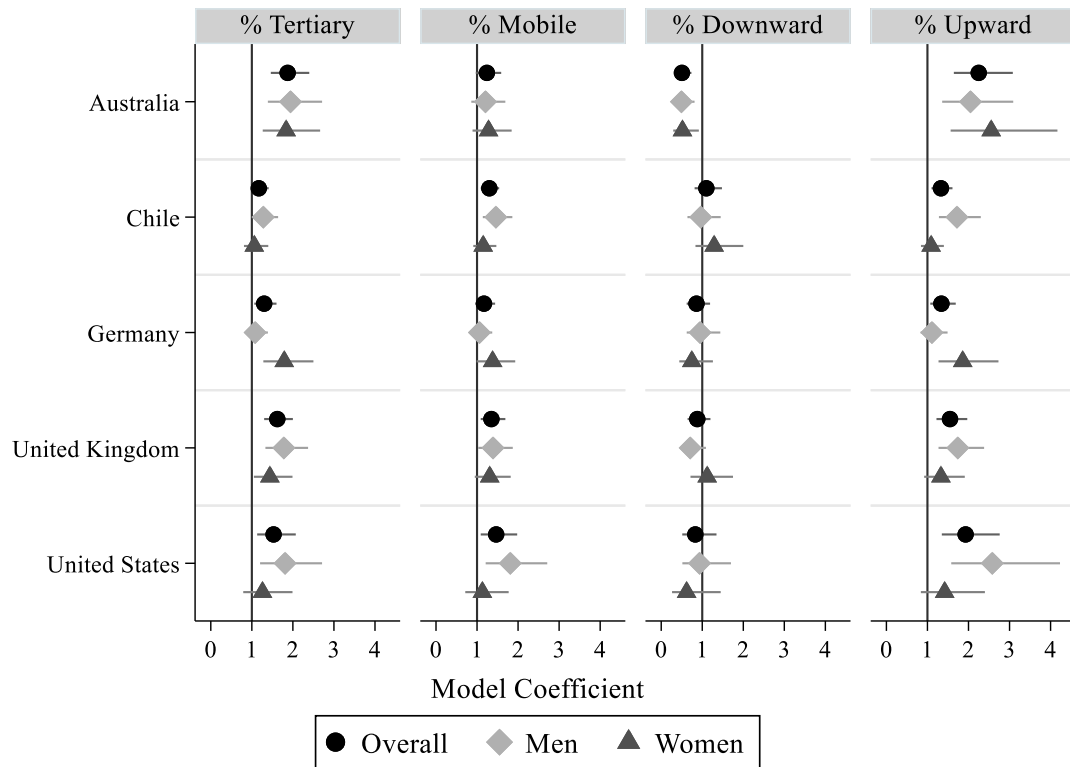

Notes: Odds ratios from logistic regression models (95% confidence intervals) based on coarsened exact matching. Matching variables: age, ethno-migrant or racial background, parental education, and gender. Each odds ratio comes from a separate model for a specific country, mobility type, and gender. Data from 2012, 2016 and 2020 for HILDA (Australia), 2017 for CASEN (Chile), 2016 and 2019 for SOEP (Germany), 2011/2012 and 2017/2018 for UK-HLS (UK), and 2008-2018 for the GSS (US)

**Figure C2.** Odds ratios from logistic regression models based on matched samples explaining mobility among bisexual individuals (Reference category: *Heterosexual*)

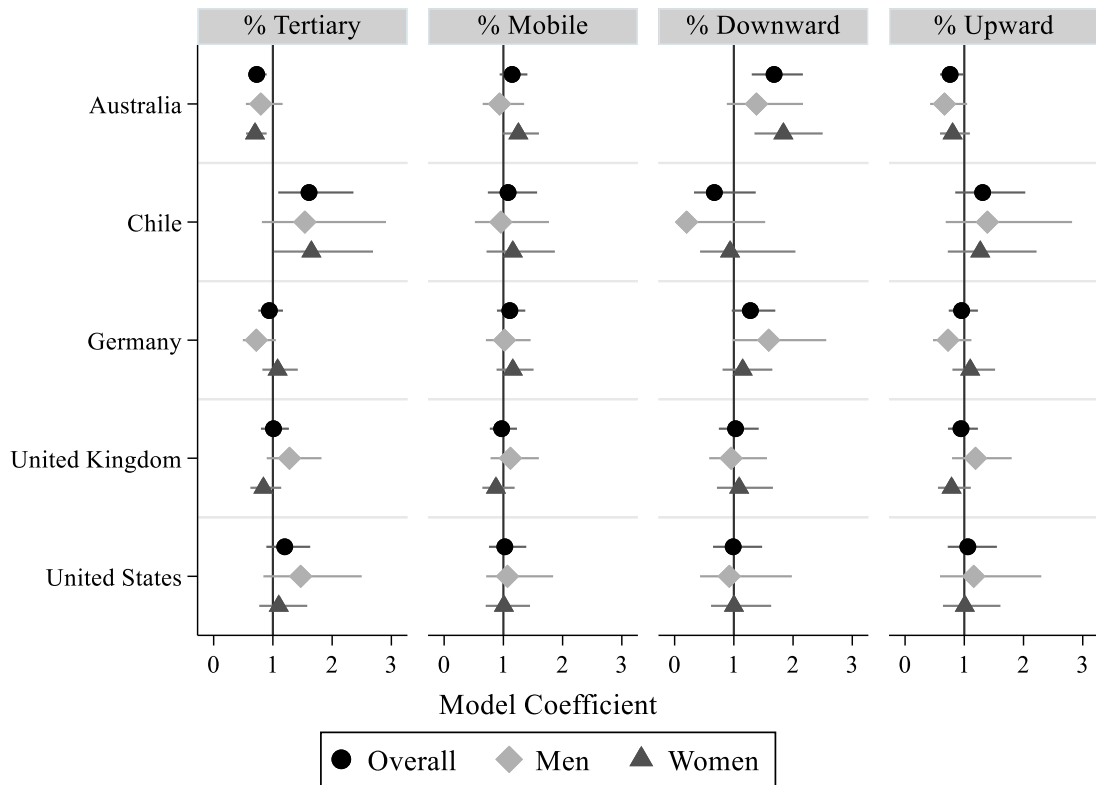

*Notes:* Odds ratios from logistic regression models (95% confidence intervals) based on coarsened exact matching. Matching variables: age, ethno-migrant or racial background, parental education, and gender. Each odds ratio comes from a separate model for a specific country, mobility type, and gender. Data from 2012, 2016 and 2020 for HILDA (Australia), 2017 for CASEN (Chile), 2016 and 2019 for SOEP (Germany), 2011/2012 and 2017/2018 for UK-HLS (UK), and 2008-2018 for the GSS (US)



**Figure C3.** Coefficients of linear probability models based on matched samples explaining mobility among gay/lesbian individuals (Reference category: “heterosexual”) using multiple imputation

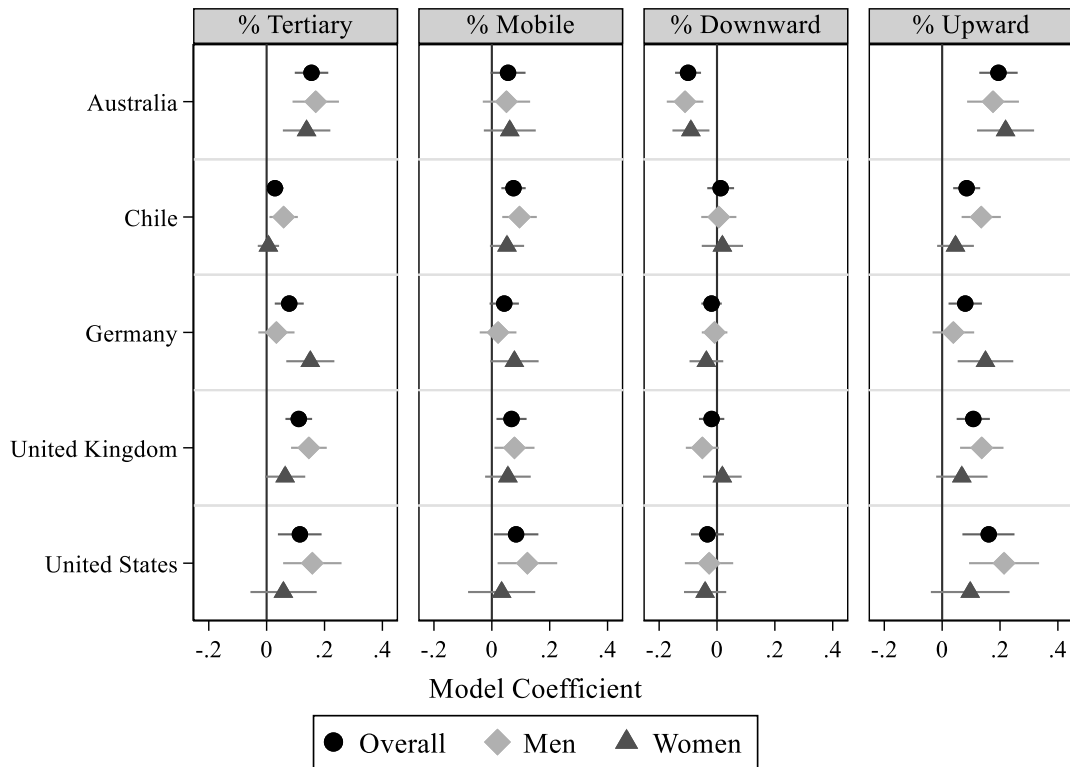

*Notes:* Coefficients from linear probability models (95% confidence intervals) based on CEM. Matching variables: age, ethno-migrant or racial background, parental education, and gender (in the pooled models). Each coefficient comes from a separate model for a specific country and mobility type; for the estimates for men and women separate models by gender are run. Results based on 20 imputations of missing information on own and parental education using chained imputation and ordered logit models and age, foreign-born status, wave, gender/sex and sexual orientation as predictors in the imputation model. Data from 2012, 2016 and 2020 for HILDA (Australia), 2017 for CASEN (Chile), 2016 and 2019 for SOEP (Germany), 2011/2012 and 2017/2018 for UK-HLS (UK), and 2008-2018 for the GSS (US)

**Figure C4.** Coefficients of linear probability models based on matched samples explaining mobility among bisexual individuals (Reference category: “heterosexual”) using multiple imputation

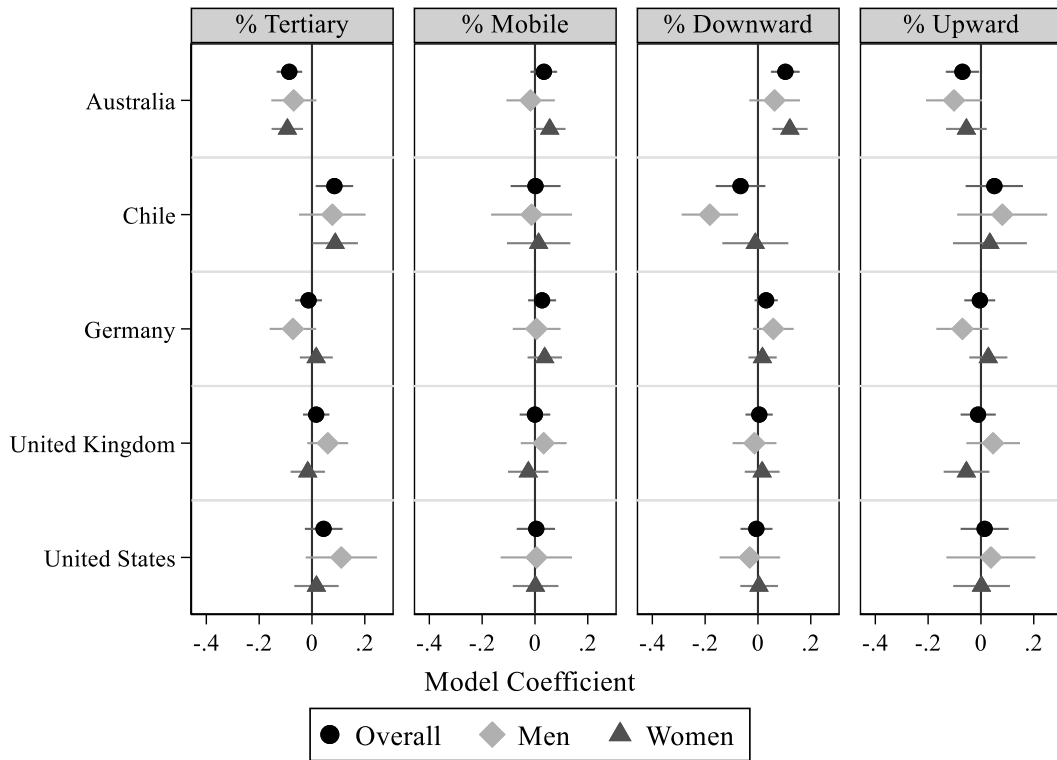

*Notes:* Coefficients from linear probability models (95% confidence intervals) based on CEM. Matching variables: age, ethno-migrant or racial background, parental education, and gender (in the pooled models). Each coefficient comes from a separate model for a specific country and mobility type; for the estimates for men and women separate models by gender are run. Results based on 20 imputations of missing information on own and parental education using chained imputation and ordered logit models and age, foreign-born status, wave, gender/sex and sexual orientation as predictors in the imputation model. Data from 2012, 2016 and 2020 for HILDA (Australia), 2017 for CASEN (Chile), 2016 and 2019 for SOEP (Germany), 2011/2012 and 2017/2018 for UK-HLS (UK), and 2008-2018 for the GSS (US)

### Online Appendix D. Further considerations on use of sexual-identity questions

In our main analyses, we excluded individuals who responded *Other* to the sexual-identity question. This course of action aligns with that followed in previous studies (see e.g., Aksoy et al., 2018; Mittleman, 2022; Mize, 2016). In this section, we provide some more information on this group and our justification to consider it separately from both the *Heterosexual* and *Gay/Lesbian* groups. We also present selected results for this group of respondents.

*Other* can be an option chosen by individuals with non-heterosexual identities other than gay/lesbian or bisexual, including pansexual, queer, and asexual (Goldberg et al., 2020). However, some of these non-heterosexual individuals might also opt for one of the LGB labels when presented with the traditional format of surveys questions on sexual-identity, or refuse to respond (Ridolfo et al., 2012). Previous research has shown that the *Other* category also comprises heterosexual individuals who do not understand the question or the terms used in the response options (Elliott et al., 2019; Wooden, 2014). The *Other* group is therefore difficult to handle and interpret.

In our data, 7% of the sample answered *Other* in Germany, compared to just 0.8% in Australia and the UK. This might hint at a larger share of non-heterosexual individuals not identifying as LGB in Germany, but could also be related to the lack of a word for “straight” in the German answer option *Heterosexual* (Kühne et al., 2019). Inclusion of the word “straight” as part of that response option has been shown to reduce the share of individuals answering *Other* in English-based surveys (Ridolfo et al., 2012).

In Tables D1 to D3 we show how sexual identities changed across waves. Of individuals reporting an *Other* identity in the first wave of the panel datasets, 52% (HILDA), 75% (UK-HLS) and 80% (SOEP) identified as heterosexual in the second wave. Only a small share identified as *Other* in both waves (9% to 20) and an even smaller share identified as LGB in the second wave (1% to 4%).

**Table D1.** Sexual identity in Wave 16 of HILDA by sexual identity in Wave 12 (%)

|                            | Sexual identity in Wave 16 |             |          |       |                  | Frequency |
|----------------------------|----------------------------|-------------|----------|-------|------------------|-----------|
|                            | Heterosexual               | Gay/Lesbian | Bisexual | Other | Refused / Unsure |           |
| Sexual identity in Wave 12 |                            |             |          |       |                  |           |
| Heterosexual               | 96.2                       | 0.1         | 0.8      | 0.5   | 2.4              | 12,168    |
| Gay/Lesbian                | 2.4                        | 89.3        | 3.0      | 1.2   | 4.2              | 177       |
| Bisexual                   | 36.5                       | 5.4         | 45.5     | 3.6   | 9.0              | 176       |
| Other                      | 51.8                       | 2.3         | 1.2      | 20.0  | 24.7             | 92        |
| Refused/Unsure             | 43.8                       | 2.6         | 5.0      | 4.2   | 44.4             | 448       |

Notes: *Refused/Unsure* includes Refused to answer/not stated, don't know/unsure and prefer not to say. Data from 2012 and 2016.

**Table D2.** Sexual identity in Wave 35 of SOEP based on identity in Wave 32 (%)

|                            | Sexual identity in Wave 35 |             |          |       |                  | Frequency |
|----------------------------|----------------------------|-------------|----------|-------|------------------|-----------|
|                            | Heterosexual               | Gay/Lesbian | Bisexual | Other | Refused / Unsure |           |
| Sexual identity in Wave 32 |                            |             |          |       |                  |           |
| Heterosexual               | 96.0                       | 0.2         | 0.6      | N/A   | 3.3              | 14,748    |
| Gay/Lesbian                | 7.7                        | 82.1        | 6.0      | N/A   | 4.3              | 117       |
| Bisexual                   | 34.4                       | 3.2         | 53.8     | N/A   | 8.6              | 93        |
| Other                      | 80.1                       | 0.3         | 0.7      | N/A   | 19.0             | 1,108     |
| Refused/Unsure             | 69.0                       | 0.7         | 1.6      | N/A   | 28.8             | 858       |

*Notes: Refused/Unsure* includes refused to answer/not stated, don't know/unsure and prefer not to say. Data from 2016 and 2019.

**Table D3.** Sexual identity in Wave 9 of UK-HLS by sexual identity in Wave 3 (%)

|                           | Sexual identity in Wave 9 |             |          |       |                  | Frequency |
|---------------------------|---------------------------|-------------|----------|-------|------------------|-----------|
|                           | Heterosexual              | Gay/Lesbian | Bisexual | Other | Refused / Unsure |           |
| Sexual identity in Wave 3 |                           |             |          |       |                  |           |
| Heterosexual              | 97.0                      | 0.1         | 0.6      | 0.4   | 1.9              | 21,448    |
| Gay/Lesbian               | 5.4                       | 87.1        | 2.2      | 1.8   | 3.6              | 279       |
| Bisexual                  | 40.6                      | 6.1         | 45.3     | 3.8   | 4.3              | 212       |
| Other                     | 75.1                      | 2.1         | 1.6      | 8.8   | 12.4             | 193       |
| Refused/Unsure            | 65.6                      | 2.8         | 3.4      | 2.0   | 26.2             | 642       |

*Notes: Refused/Unsure* includes refused to answer/not stated, don't know and prefer not to say. Data from 2011/2012 and 2017/2018.

Online Appendix E. Results for other response categories to the sexual-identity question

**Figure E1.** Coefficients of linear probability models based on matched samples explaining mobility among individuals who answered *Other*, *Don't Know*, *Prefer Not to Say* or *Refused to answer* to the sexual-identity question (Reference category: *Heterosexual*)

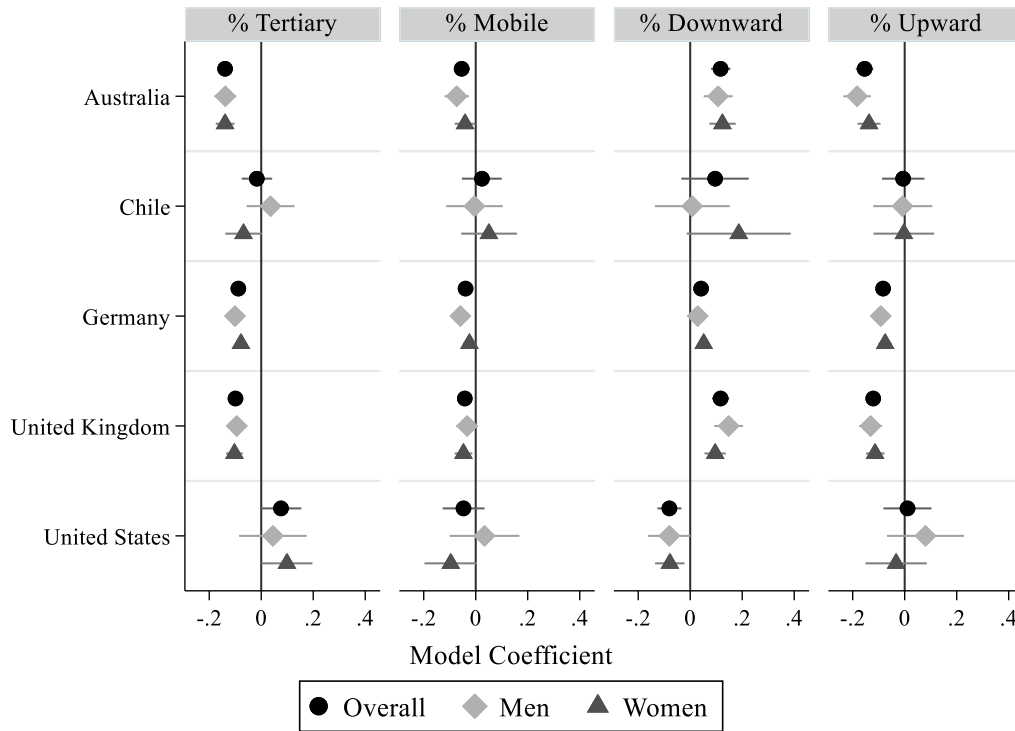

*Notes:* Coefficients from linear probability models (95% confidence intervals) based on coarsened exact matching. Matching variables: age, ethno-migrant or racial background, parental education, and gender. Each coefficient comes from a separate model for a specific country, mobility type, and gender. Data from 2012, 2016 and 2020 for HILDA (Australia), 2017 for CASEN (Chile), 2016 and 2019 for SOEP (Germany), 2011/2012 and 2017/2018 for UK-HLS (UK), and 2008-2018 for the GSS (US).

**Figure E2.** Coefficients of linear probability models based on matched samples explaining mobility among individuals who answered *Other* to the sexual-identity question (Reference category: *Heterosexual*)

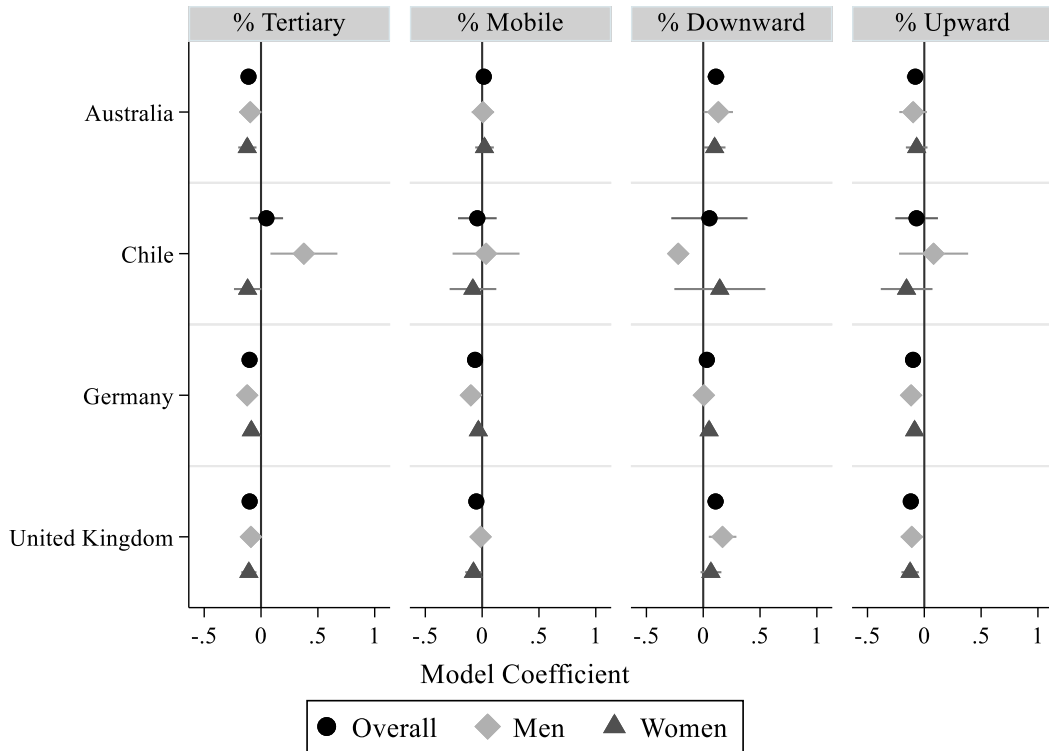

*Notes:* Coefficients from linear probability models (95% confidence intervals) based on coarsened exact matching. Matching variables: age, ethno-migrant or racial background, parental education, and gender. Each coefficient comes from a separate model for a specific country, mobility type, and gender. Data from 2012, 2016 and 2020 for HILDA (Australia), 2017 for CASEN (Chile), 2016 and 2019 for SOEP (Germany), 2011/2012 and 2017/2018 for UK-HLS (UK), and 2008-2018 for the GSS (US).

**Figure E3.** Coefficients of linear probability models based on matched samples explaining mobility among individuals who answered *Don't Know*, *Prefer Not to Say* or *Refused to answer* to the sexual-identity question (Reference category: *Heterosexual*)

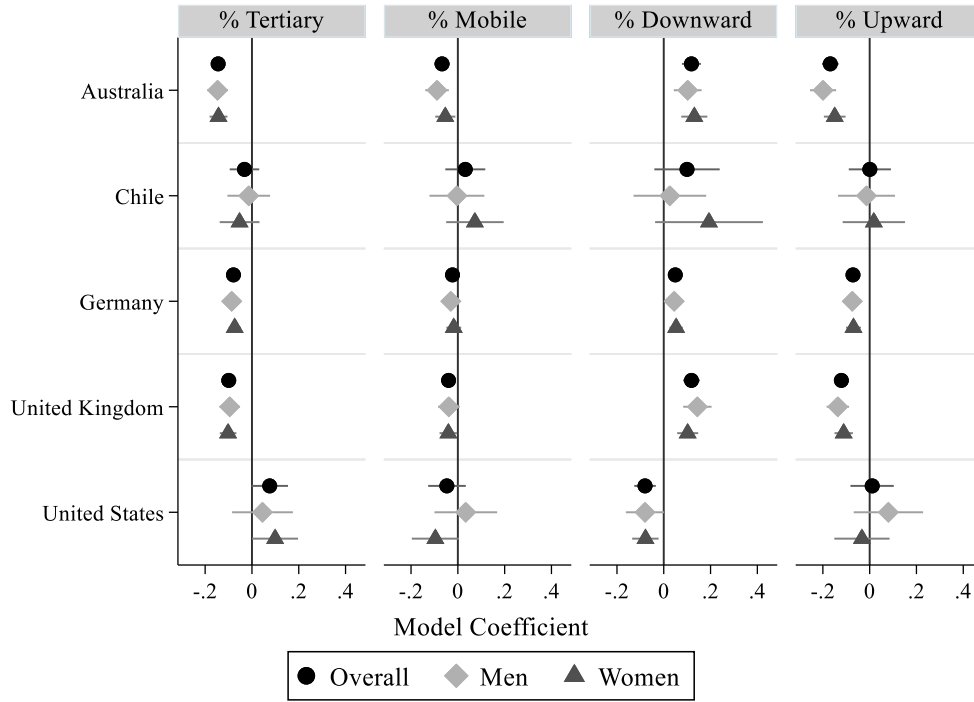

*Notes:* Coefficients from linear probability models (95% confidence intervals) based on coarsened exact matching. Matching variables: age, ethno-migrant or racial background, parental education, and gender. Each coefficient comes from a separate model for a specific country, mobility type, and gender. Data from 2012, 2016 and 2020 for HILDA (Australia), 2017 for CASEN (Chile), 2016 and 2019 for SOEP (Germany), 2011/2012 and 2017/2018 for UK-HLS (UK), and 2008-2018 for the GSS (US).

Online Appendix F. Results using alternative specifications of education

**Figure F1.** Share of respondents attaining *Hauptschule* (Casmin 1abc), *Realschule* (Casmin 2ab), *Abitur* (Casmin 2c), lower tertiary education (Casmin 3a) and higher tertiary education (Casmin 3b) by parental education (Germany)

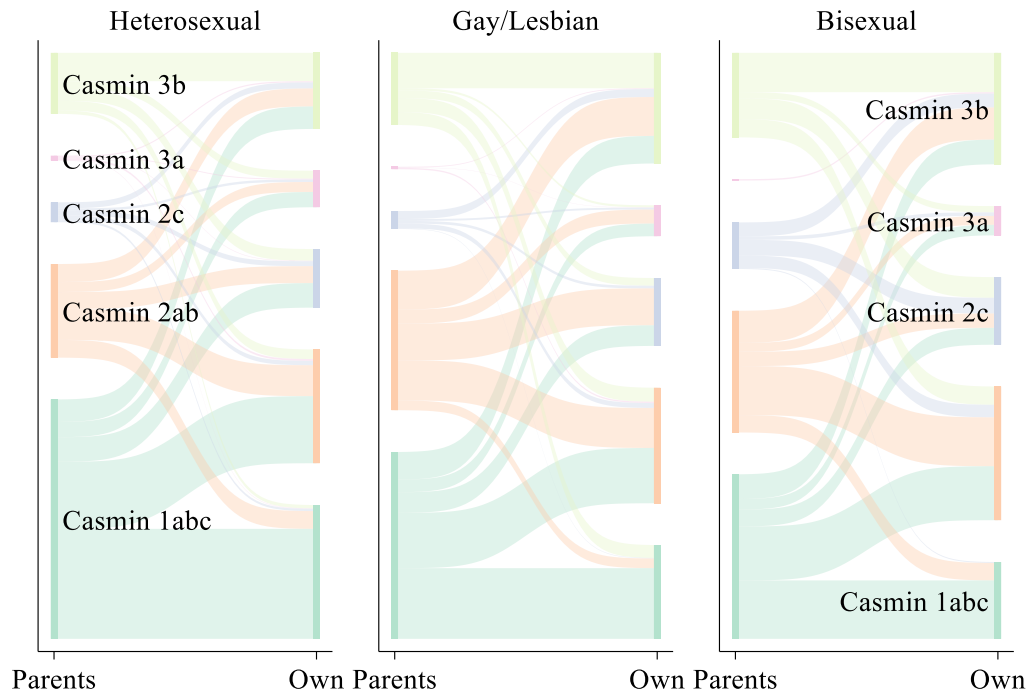

Notes: Flowcharts based on weighted descriptive statistics (Table 1). Data: SOEP 2016 & 2019.



**Figure F2.** Share of respondents attaining primary (ISCED 1), lower secondary (ISCED 2), upper secondary (ISCED 3-4) and tertiary (ISCED 5-6) education by parental education (Chile)

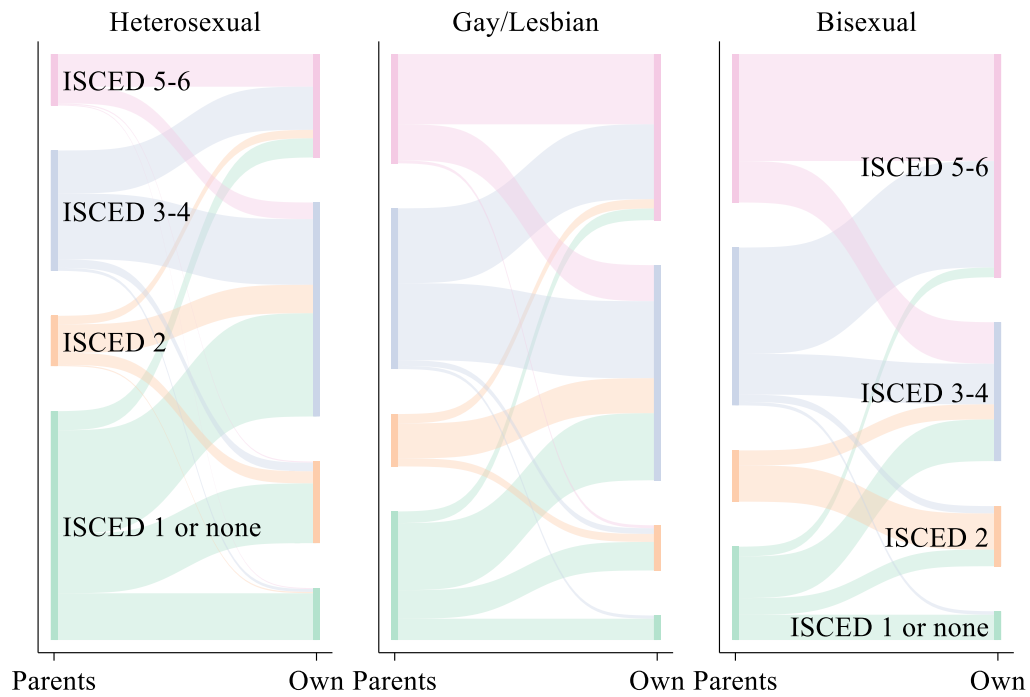

Notes: Flowcharts based on weighted descriptive statistics (Table 1). Data: CASEN 2017.

**Figure F3.** Attainment and mobility differences between gay/lesbian and heterosexual individuals (matched samples) using detailed educational categories (CASMIN for Germany, primary, lower secondary, upper secondary, tertiary for Chile)

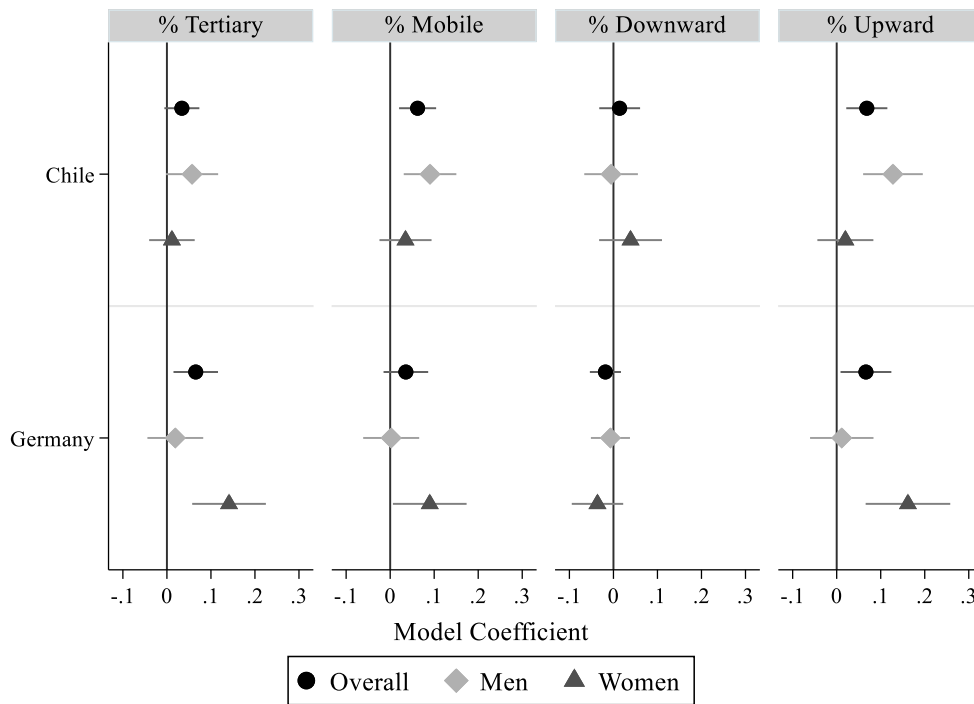

*Notes:* Coefficients from linear probability models (95% confidence intervals) based on coarsened exact matching. Matching variables: age, ethno-migrant or racial background, parental education, and gender. Each coefficient comes from a separate model for a specific country, mobility type, and gender. Data from 2017 for CASEN (Chile), 2016 and 2019 for SOEP (Germany).

**Figure F4.** Attainment and mobility differences between bisexual and heterosexual individuals (matched samples) using detailed educational categories (CASMIN for Germany, primary, lower secondary, upper secondary, tertiary for Chile)

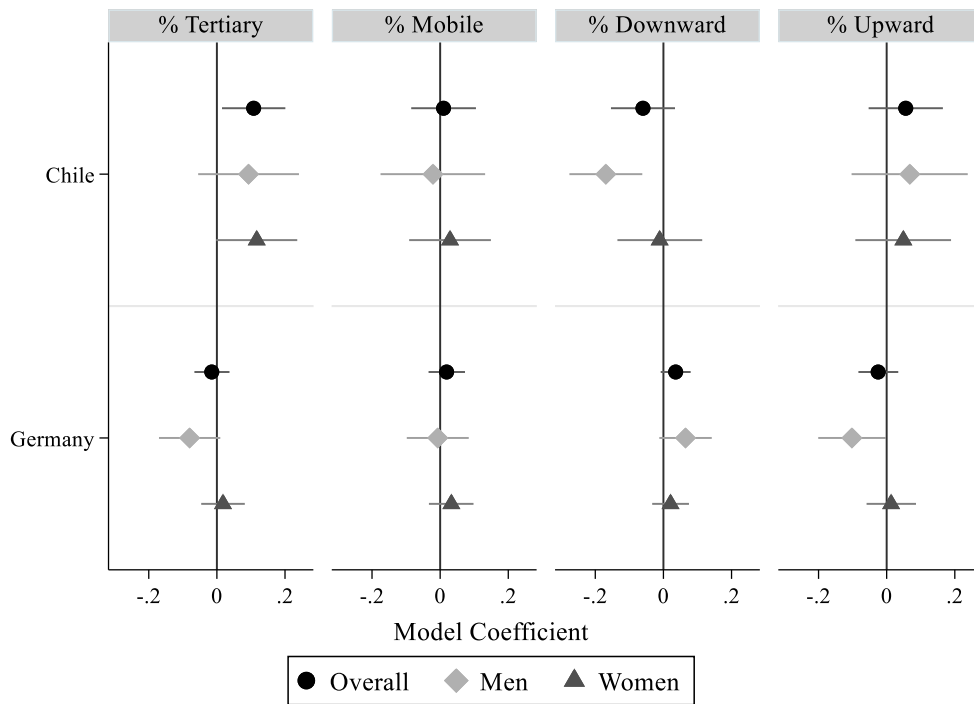

*Notes:* Coefficients from linear probability models (95% confidence intervals) based on coarsened exact matching. Matching variables: age, ethno-migrant or racial background, parental education, and gender. Each coefficient comes from a separate model for a specific country, mobility type, and gender. Data from 2017 for CASEN (Chile), 2016 and 2019 for SOEP (Germany).

**Tables F1a-e.** Share of respondents attaining low, middle, and high education according to highest level of parental education and parents' combined level of education.

| <i>Australia</i>                                        | Own education (ISCED; %) |     |     |             |     |     |              |     |     |
|---------------------------------------------------------|--------------------------|-----|-----|-------------|-----|-----|--------------|-----|-----|
|                                                         | Bisexual                 |     |     | Gay/Lesbian |     |     | Heterosexual |     |     |
|                                                         | 5-6                      | 3-4 | 1-2 | 5-6         | 3-4 | 1-2 | 5-6          | 3-4 | 1-2 |
| <i>Parental Education (Highest)</i>                     |                          |     |     |             |     |     |              |     |     |
| ISCED 5-6 (High)                                        | 61                       | 31  | 8   | 75          | 22  | 3   | 68           | 26  | 6   |
| ISCED 3-4 (Mid)                                         | 33                       | 47  | 20  | 59          | 34  | 7   | 40           | 41  | 18  |
| ISCED 1-2 (Low)                                         | 45                       | 33  | 21  | 35          | 53  | 12  | 30           | 36  | 34  |
| <i>Parental Education (Combination of both parents)</i> |                          |     |     |             |     |     |              |     |     |
| Both High                                               | 86                       | 12  | 2   | 85          | 15  | 0   | 82           | 16  | 2   |
| High/Mid                                                | 47                       | 43  | 9   | 78          | 19  | 2   | 66           | 29  | 6   |
| High/Low                                                | 39                       | 42  | 19  | 64          | 31  | 5   | 56           | 31  | 12  |
| Both Mid                                                | 24                       | 59  | 17  | 64          | 30  | 7   | 46           | 43  | 12  |
| Mid/Low                                                 | 34                       | 43  | 23  | 54          | 38  | 8   | 38           | 39  | 22  |
| Both Low                                                | 49                       | 32  | 20  | 30          | 57  | 13  | 32           | 35  | 33  |

| <i>Chile</i>                                            | Own education (ISCED; %) |     |     |             |     |     |              |     |     |
|---------------------------------------------------------|--------------------------|-----|-----|-------------|-----|-----|--------------|-----|-----|
|                                                         | Bisexual                 |     |     | Gay/Lesbian |     |     | Heterosexual |     |     |
|                                                         | 5-6                      | 3-4 | 1-2 | 5-6         | 3-4 | 1-2 | 5-6          | 3-4 | 1-2 |
| <i>Parental Education (Highest)</i>                     |                          |     |     |             |     |     |              |     |     |
| ISCED 5-6 (High)                                        | 72                       | 28  | 0   | 64          | 33  | 3   | 64           | 33  | 4   |
| ISCED 3-4 (Mid)                                         | 67                       | 25  | 7   | 46          | 48  | 5   | 35           | 55  | 10  |
| ISCED 1-2 (Low)                                         | 7                        | 39  | 54  | 12          | 56  | 32  | 10           | 47  | 43  |
| <i>Parental Education (Combination of both parents)</i> |                          |     |     |             |     |     |              |     |     |
| Both High                                               | 76                       | 24  | 0   | 69          | 31  | 0   | 71           | 27  | 3   |
| High/Mid                                                | 65                       | 35  | 0   | 71          | 29  | 0   | 69           | 30  | 1   |
| High/Low                                                | 100                      | 0   | 0   | 42          | 44  | 14  | 42           | 47  | 11  |
| Both Mid                                                | 63                       | 33  | 4   | 55          | 43  | 2   | 44           | 50  | 6   |
| Mid/Low                                                 | 72                       | 18  | 10  | 34          | 56  | 10  | 28           | 59  | 13  |
| Both Low                                                | 7                        | 38  | 56  | 9           | 59  | 32  | 10           | 47  | 43  |

| <i>Germany</i>                                          | Own education (ISCED; %) |     |     |             |     |     |              |     |     |
|---------------------------------------------------------|--------------------------|-----|-----|-------------|-----|-----|--------------|-----|-----|
|                                                         | Bisexual                 |     |     | Gay/Lesbian |     |     | Heterosexual |     |     |
|                                                         | 5-6                      | 3-4 | 1-2 | 5-6         | 3-4 | 1-2 | 5-6          | 3-4 | 1-2 |
| <i>Parental Education (Highest)</i>                     |                          |     |     |             |     |     |              |     |     |
| ISCED 5-6 (High)                                        | 56                       | 39  | 4   | 52          | 29  | 18  | 63           | 34  | 3   |
| ISCED 3-4 (Mid)                                         | 33                       | 58  | 9   | 39          | 57  | 5   | 30           | 61  | 9   |
| ISCED 1-2 (Low)                                         | 5                        | 65  | 30  | 16          | 60  | 24  | 17           | 58  | 25  |
| <i>Parental Education (Combination of both parents)</i> |                          |     |     |             |     |     |              |     |     |
| Both High                                               | 83                       | 11  | 6   | 74          | 22  | 4   | 74           | 25  | 1   |
| High/Mid                                                | 46                       | 49  | 4   | 52          | 21  | 27  | 63           | 35  | 2   |
| High/Low                                                | 48                       | 52  | 0   | 52          | 48  | 0   | 46           | 44  | 9   |
| Both Mid                                                | 33                       | 58  | 9   | 38          | 56  | 5   | 35           | 59  | 6   |
| Mid/Low                                                 | 34                       | 56  | 9   | 39          | 55  | 5   | 23           | 63  | 13  |
| Both Low                                                | 5                        | 65  | 30  | 16          | 60  | 24  | 17           | 58  | 25  |

| UK                                                      | Own education (ISCED; %) |     |     |             |     |     |              |     |     |
|---------------------------------------------------------|--------------------------|-----|-----|-------------|-----|-----|--------------|-----|-----|
|                                                         | Bisexual                 |     |     | Gay/Lesbian |     |     | Heterosexual |     |     |
|                                                         | 5-6                      | 3-4 | 1-2 | 5-6         | 3-4 | 1-2 | 5-6          | 3-4 | 1-2 |
| <i>Parental Education (Highest)</i>                     |                          |     |     |             |     |     |              |     |     |
| ISCED 5-6 (High)                                        | 79                       | 17  | 4   | 76          | 25  | 0   | 73           | 21  | 6   |
| ISCED 3-4 (Mid)                                         | 38                       | 46  | 15  | 55          | 32  | 12  | 43           | 40  | 17  |
| ISCED 1-2 (Low)                                         | 37                       | 36  | 27  | 45          | 27  | 28  | 22           | 32  | 47  |
| <i>Parental Education (Combination of both parents)</i> |                          |     |     |             |     |     |              |     |     |
| Both High                                               | 77                       | 19  | 4   | 79          | 21  | 0   | 82           | 12  | 6   |
| High/Mid                                                | 85                       | 10  | 5   | 72          | 28  | 0   | 72           | 23  | 5   |
| High/Low                                                | 60                       | 40  | 0   | 85          | 15  | 0   | 56           | 32  | 12  |
| Both Mid                                                | 46                       | 39  | 16  | 57          | 32  | 11  | 48           | 40  | 12  |
| Mid/Low                                                 | 35                       | 52  | 14  | 56          | 29  | 15  | 37           | 40  | 23  |
| Both Low                                                | 40                       | 33  | 26  | 46          | 25  | 29  | 22           | 31  | 47  |

| US                                                      | Own education (ISCED; %) |     |     |             |     |     |              |     |     |
|---------------------------------------------------------|--------------------------|-----|-----|-------------|-----|-----|--------------|-----|-----|
|                                                         | Bisexual                 |     |     | Gay/Lesbian |     |     | Heterosexual |     |     |
|                                                         | 5-6                      | 3-4 | 1-2 | 5-6         | 3-4 | 1-2 | 5-6          | 3-4 | 1-2 |
| <i>Parental Education (Highest)</i>                     |                          |     |     |             |     |     |              |     |     |
| ISCED 5-6 (High)                                        | 67                       | 32  | 2   | 66          | 34  | 0   | 63           | 36  | 1   |
| ISCED 3-4 (Mid)                                         | 29                       | 69  | 3   | 48          | 51  | 1   | 29           | 68  | 3   |
| ISCED 1-2 (Low)                                         | 27                       | 54  | 19  | 13          | 77  | 10  | 13           | 65  | 22  |
| <i>Parental Education (Combination of both parents)</i> |                          |     |     |             |     |     |              |     |     |
| Both High                                               | 73                       | 27  | 0   | 84          | 16  | 0   | 70           | 29  | 1   |
| High/Mid                                                | 55                       | 41  | 4   | 53          | 47  | 0   | 58           | 42  | 0   |
| High/Low                                                | 87                       | 13  | 0   | 100         | 0   | 0   | 41           | 48  | 11  |
| Both Mid                                                | 34                       | 62  | 3   | 48          | 51  | 1   | 31           | 67  | 2   |
| Mid/Low                                                 | 0                        | 100 | 0   | 51          | 49  | 0   | 24           | 72  | 4   |
| Both Low                                                | 27                       | 54  | 19  | 13          | 77  | 10  | 13           | 65  | 22  |

Notes: Figures based on weighted descriptive statistics (Table 1).

Online Appendix G. Descriptive statistics stratified by sexual identity

**Table G1.** Descriptive statistics, Australia

|                                              | Heterosexual<br>% | Gay/Lesbian<br>% | Bisexual<br>% | Other<br>% | Refused<br>% |
|----------------------------------------------|-------------------|------------------|---------------|------------|--------------|
| <i>Gender</i>                                |                   |                  |               |            |              |
| Woman                                        | 51.5              | 34.6             | 62.6          | 56.5       | 57.9         |
| <i>Age Group</i>                             |                   |                  |               |            |              |
| 25-34 years                                  | 21.0              | 34.2             | 45.2          | 31.1       | 26.5         |
| 35-44 years                                  | 21.4              | 23.4             | 21.9          | 12.6       | 14.7         |
| 45-54 years                                  | 20.4              | 22.6             | 11.6          | 15.5       | 17.7         |
| 55-64 years                                  | 17.8              | 13.4             | 13.0          | 21.8       | 15.8         |
| 65-74 years                                  | 13.0              | 5.4              | 6.4           | 10.5       | 15.0         |
| 75-84 years                                  | 6.4               | 1.0              | 1.9           | 8.5        | 10.2         |
| <i>Ethno-migrant background</i>              |                   |                  |               |            |              |
| Native born, Indigenous                      | 1.6               | 1.7              | 4.5           | 3.1        | 3.5          |
| Native born, Non-Indigenous                  | 67.7              | 68.0             | 67.4          | 54.0       | 39.8         |
| Foreign born, major English-speaking country | 12.3              | 14.6             | 8.9           | 2.5        | 4.9          |
| Foreign born, other country                  | 18.3              | 15.7             | 19.3          | 40.4       | 51.8         |
| <i>n (observations)</i>                      | 32,969            | 574              | 563           | 292        | 1,442        |

Notes: Weighted descriptive statistics. 2012, 2016, 2020 data from HILDA.

**Table G2.** Descriptive statistics, Chile

|                             | Heterosexual<br>% | Gay/Lesbian<br>% | Bisexual<br>% | Other<br>% | Refused<br>% |
|-----------------------------|-------------------|------------------|---------------|------------|--------------|
| <i>Gender</i>               |                   |                  |               |            |              |
| Woman                       | 43.8              | 40.1             | 57.5          | 71.2       | 42.9         |
| <i>Age Group</i>            |                   |                  |               |            |              |
| 25-34 years                 | 14.2              | 37.8             | 45.1          | 9.6        | 14.9         |
| 35-44 years                 | 17.4              | 22.1             | 18.3          | 15.0       | 9.2          |
| 45-54 years                 | 20.8              | 18.6             | 10.6          | 15.4       | 30.1         |
| 55-64 years                 | 21.2              | 12.4             | 11.3          | 12.0       | 23.0         |
| 65-74 years                 | 17.2              | 7.4              | 11.2          | 10.6       | 17.1         |
| 75-84 years                 | 9.3               | 1.8              | 3.5           | 37.4       | 5.7          |
| <i>Migration-background</i> |                   |                  |               |            |              |
| Native born                 | 94.8              | 89.0             | 93.6          | 99.0       | 97.5         |
| Foreign born                | 5.2               | 10.9             | 6.4           | 0.1        | 2.5          |
| Missing                     |                   |                  |               |            |              |
| <i>n (observations)</i>     | 47,534            | 546              | 108           | 33         | 126          |

Notes: Weighted descriptive statistics. 2017 CASEN

**Table G3.** Descriptive statistics, Germany

|                             | Heterosexual<br>% | Gay/Lesbian<br>% | Bisexual<br>% | Other<br>% | Refused<br>% |
|-----------------------------|-------------------|------------------|---------------|------------|--------------|
| <i>Gender</i>               |                   |                  |               |            |              |
| Woman                       | 50.4              | 40.8             | 65.7          | 56.7       | 58.3         |
| <i>Age Group</i>            |                   |                  |               |            |              |
| 25-34 years                 | 17.8              | 28.8             | 39.3          | 9.9        | 8.2          |
| 35-44 years                 | 17.7              | 19.5             | 22.4          | 9.6        | 9.6          |
| 45-54 years                 | 22.2              | 26.5             | 16.9          | 16.1       | 17.9         |
| 55-64 years                 | 19.0              | 14.7             | 8.3           | 21.6       | 21.7         |
| 65-74 years                 | 13.5              | 8.0              | 9.8           | 21.7       | 19.9         |
| 75-84 years                 | 9.8               | 2.6              | 3.3           | 21.0       | 22.7         |
| <i>Migration-background</i> |                   |                  |               |            |              |
| Native born                 | 84.6              | 89.9             | 91.0          | 88.0       | 85.7         |
| Foreign born                | 15.4              | 10.1             | 9.0           | 12.0       | 14.3         |
| <i>Missing</i>              |                   |                  |               |            |              |
| <i>n (observations)</i>     | 37,285            | 509              | 395           | 1,444      | 2,069        |

Notes: Weighted descriptive statistics. 2016 and 2019 data from SOEP.

**Table G4.** Descriptive statistics, UK

|                             | Heterosexual<br>% | Gay/Lesbian<br>% | Bisexual<br>% | Other<br>% | Refused<br>% |
|-----------------------------|-------------------|------------------|---------------|------------|--------------|
| <i>Gender</i>               |                   |                  |               |            |              |
| Woman                       | 53.9              | 40.2             | 55.0          | 53.8       | 54.0         |
| <i>Age Group</i>            |                   |                  |               |            |              |
| 25-34 years                 | 16.3              | 21.6             | 37.4          | 23.7       | 14.8         |
| 35-44 years                 | 19.8              | 23.8             | 22.9          | 18.5       | 18.0         |
| 45-54 years                 | 21.4              | 30.4             | 21.6          | 21.2       | 19.7         |
| 55-64 years                 | 19.4              | 15.1             | 9.7           | 15.4       | 17.4         |
| 65-74 years                 | 15.4              | 6.9              | 6.8           | 15.0       | 18.3         |
| 75-84 years                 | 7.8               | 2.3              | 1.6           | 6.2        | 11.8         |
| <i>Migration-background</i> |                   |                  |               |            |              |
| Native born                 | 89.8              | 89.6             | 85.6          | 73.6       | 71.9         |
| Foreign born                | 10.2              | 10.4             | 14.4          | 26.4       | 28.1         |
| <i>n (observations)</i>     | 35,552            | 495              | 337           | 293        | 1,168        |

Notes: Weighted descriptive statistics. 2011/2012 and 2017/2018 data from UK-HLS.

**Table G5.** Descriptive statistics, US

|                             | Heterosexual<br>% | Gay/Lesbian<br>% | Bisexual<br>% | Refused<br>% |
|-----------------------------|-------------------|------------------|---------------|--------------|
| <i>Gender</i>               |                   |                  |               |              |
| Woman                       | 54.2              | 47.6             | 72.5          | 62.5         |
| <i>Age Group</i>            |                   |                  |               |              |
| 25-34 years                 | 21.5              | 34.3             | 46.6          | 17.7         |
| 35-44 years                 | 21.6              | 21.9             | 25.2          | 22.4         |
| 45-54 years                 | 21.2              | 21.5             | 15.5          | 15.4         |
| 55-64 years                 | 19.4              | 15.5             | 8.4           | 25.0         |
| 65-74 years                 | 11.3              | 6.1              | 2.6           | 13.6         |
| 75-84 years                 | 5.0               | 0.6              | 1.5           | 5.8          |
| <i>Migration-background</i> |                   |                  |               |              |
| Native born                 | 86.5              | 92.3             | 84.9          | 63.8         |
| Foreign born                | 13.5              | 7.7              | 15.1          | 36.2         |
| <i>Ethnicity</i>            |                   |                  |               |              |
| Black                       | 13.5              | 13.3             | 14.7          | 14.1         |
| Other                       | 9.9               | 6.8              | 12.9          | 23.8         |
| White                       | 76.5              | 79.9             | 72.4          | 62.1         |
| <i>n (observations)</i>     | 8,949             | 183              | 206           | 170          |

Notes: Weighted descriptive statistics. 2008-2018 data from GSS.



Online Appendix H. Results using alternative methods

**Table H1.** Unidiff models testing for differences in intergenerational association of education across groups

|                  | Overall      |            | Men          |            | Women        |            |
|------------------|--------------|------------|--------------|------------|--------------|------------|
|                  | <i>Coef.</i> | <i>SE.</i> | <i>Coef.</i> | <i>SE.</i> | <i>Coef.</i> | <i>SE.</i> |
| <i>Australia</i> |              |            |              |            |              |            |
| Bisexual         | -0.30        | 0.18       | -0.39        | 0.21       | -0.27        | 0.20       |
| Gay/Lesbian      | 0.01         | 0.16       | 0.13         | 0.36       | -0.17        | 0.27       |
| <i>Chile</i>     |              |            |              |            |              |            |
| Bisexual         | 0.10         | 0.21       | 0.76*        | 0.30       | -0.23        | 0.33       |
| Gay/Lesbian      | -0.13        | 0.11       | -0.16        | 0.16       | -0.14        | 0.17       |
| <i>Germany</i>   |              |            |              |            |              |            |
| Bisexual         | -0.02        | 0.15       | -0.23        | 0.23       | 0.01         | 0.16       |
| Gay/Lesbian      | -0.38*       | 0.19       | -0.26        | 0.31       | -0.50        | 0.31       |
| <i>UK</i>        |              |            |              |            |              |            |
| Bisexual         | -0.11        | 0.63       | -0.35        | 0.27       | 0.03         | 0.20       |
| Gay/Lesbian      | -0.56*       | 0.23       | -0.29        | 0.33       | -0.88*       | 0.44       |
| <i>US</i>        |              |            |              |            |              |            |
| Bisexual         | -0.29        | 0.21       | -0.75        | 0.56       | -0.11        | 0.21       |
| Gay/Lesbian      | -0.24        | 0.24       | -0.34        | 0.32       | -0.03        | 0.35       |

Notes: \*  $p < 0.05$ . Unidiff models test whether the association between three-category parental education and three-category own education differs by sexual identity (Erikson & Goldthorpe, 1992; Jann & Seiler, 2020). We ran three models for each country separately: one for the whole sample, one for men, and one for women. These models are not based on matched samples. Data from 2012, 2016 and 2020 for HILDA (Australia), 2017 for CASEN (Chile), 2016 and 2019 for SOEP (Germany), 2011/2012 and 2017/2018 for UK-HLS (UK), and 2008-2018 for the GSS (US).

**Table H2a-e.** Log-linear models testing for statistically significant differences in upward and downward mobility across groups

**Table H2a.** Log-linear models explaining the frequency of upward and downward mobility (Australia)

|                                     | Overall  |      |             |      | Men      |      |             |      | Women    |      |             |      |
|-------------------------------------|----------|------|-------------|------|----------|------|-------------|------|----------|------|-------------|------|
|                                     | Bisexual |      | Gay/Lesbian |      | Bisexual |      | Gay/Lesbian |      | Bisexual |      | Gay/Lesbian |      |
|                                     | IRR      | SE   | IRR         | SE   | IRR      | SE   | IRR         | SE   | IRR      | SE   | IRR         | SE   |
| Parental Education (Ref. ISCED 5-6) |          |      |             |      |          |      |             |      |          |      |             |      |
| ISCED 3-4                           | 1.22***  | 0.02 | 1.21***     | 0.02 | 1.21***  | 0.03 | 1.21***     | 0.03 | 1.22***  | 0.02 | 1.22***     | 0.02 |
| ISCED 1-2                           | 0.69***  | 0.01 | 0.69***     | 0.01 | 0.68***  | 0.02 | 0.68***     | 0.02 | 0.71***  | 0.02 | 0.71***     | 0.02 |
| Bisexual (Ref. Heterosexual)        | 0.02***  | 0.00 |             |      | 0.01***  | 0.00 |             |      |          |      |             |      |
| Gay/Lesbian (Ref. Heterosexual)     |          |      | 0.03***     | 0.00 |          |      | 0.03***     | 0.00 | 0.03***  | 0.00 | 0.03***     | 0.00 |
| Bisexual × Parental ISCED 3-4       | 0.84***  | 0.09 |             |      | 1.14     | 0.22 |             |      | 0.73*    | 0.10 |             |      |
| Bisexual × Parental ISCED 1-2       | 0.65***  | 0.09 |             |      | 0.84     | 0.21 |             |      | 0.57**   | 0.09 |             |      |
| Gay/Lesbian × Parental ISCED 3-4    |          |      | 0.44***     | 0.05 |          |      | 0.53***     | 0.09 |          |      | 0.36*       | 0.07 |
| Gay/Lesbian × Parental ISCED 1-2    |          |      | 0.29***     | 0.04 |          |      | 0.49***     | 0.09 |          |      | 0.15***     | 0.03 |
| <i>Mobility (Ref. Immobile)</i>     |          |      |             |      |          |      |             |      |          |      |             |      |
| Downwardly mobile                   | 0.34***  | 0.01 | 0.34***     | 0.01 | 0.34***  | 0.01 | 0.34***     | 0.01 | 0.34***  | 0.01 | 0.34***     | 0.01 |
| Upwardly mobile                     | 0.88***  | 0.01 | 0.88***     | 0.01 | 0.89***  | 0.02 | 0.89***     | 0.02 | 0.88***  | 0.02 | 0.88***     | 0.02 |
| Bisexual × Downwardly mobile        | 1.32*    | 0.15 |             |      | 1.24     | 0.25 |             |      | 1.37*    | 0.18 |             |      |
| Bisexual × Upwardly mobile          | 0.95***  | 0.11 |             |      | 0.66     | 0.13 |             |      | 1.12     | 0.15 |             |      |
| Gay/Lesbian × Downwardly mobile     |          |      | 0.48***     | 0.07 |          |      | 0.52**      | 0.11 |          |      | 0.44***     | 0.09 |
| Gay/Lesbian × Upwardly mobile       |          |      | 2.31***     | 0.26 |          |      | 2.00***     | 0.30 |          |      | 2.79***     | 0.49 |
| BIC Model                           | 2985.88  |      | 2884.31     |      | 1340.7   |      | 1365.6      |      | 1411.40  |      | 1363.5      |      |
| BIC Model without interaction       | 2986.08  |      | 2979.67     |      | 1341.7   |      | 1399.9      |      | 1411.26  |      | 1422.7      |      |

**Table H2b.** Log-linear models explaining the frequency of upward and downward mobility (Chile)

|                                     | Overall  |      |             |      | Men      |      | Women       |      |          |      |             |      |
|-------------------------------------|----------|------|-------------|------|----------|------|-------------|------|----------|------|-------------|------|
|                                     | Bisexual |      | Gay/Lesbian |      | Bisexual | SE   | Gay/Lesbian |      | Bisexual |      | Gay/Lesbian |      |
|                                     | IRR      | SE   | IRR         | SE   |          |      | IRR         | SE   | IRR      | SE   | IRR         | SE   |
| Parental Education (Ref. ISCED 5-6) |          |      |             |      |          |      |             |      |          |      |             |      |
| ISCED 3-4                           | 2.15***  | 0.04 | 2.15***     | 0.04 | 2.02***  | 0.05 | 2.02***     | 0.05 | 2.29***  | 0.06 | 2.29***     | 0.06 |
| ISCED 1-2                           | 4.92***  | 0.08 | 4.92***     | 0.08 | 4.43***  | 0.11 | 4.43***     | 0.11 | 5.48***  | 0.14 | 5.48***     | 0.14 |
| Bisexual (Ref. Heterosexual)        | 0.01***  | 0.00 |             |      | 0.00***  | 0.00 |             |      |          |      |             |      |
| Gay/Lesbian (Ref. Heterosexual)     |          |      | 0.03***     | 0.00 |          |      | 0.03***     | 0.00 | 0.01***  | 0.00 | 0.02***     | 0.00 |
| Bisexual × Parental ISCED 3-4       | 0.35***  | 0.10 |             |      | 0.23*    | 0.15 |             |      | 0.33**   | 0.11 |             |      |
| Bisexual × Parental ISCED 1-2       | 0.19***  | 0.05 |             |      | 0.23**   | 0.11 |             |      | 0.14***  | 0.05 |             |      |
| Gay/Lesbian × Parental ISCED 3-4    |          |      | 0.48***     | 0.06 |          |      | 0.34***     | 0.06 |          |      | 0.70        | 0.14 |
| Gay/Lesbian × Parental ISCED 1-2    |          |      | 0.24***     | 0.04 |          |      | 0.14***     | 0.03 |          |      | 0.41***     | 0.09 |
| <i>Mobility (Ref. Immobile)</i>     |          |      |             |      |          |      |             |      |          |      |             |      |
| Downwardly mobile                   | 0.23***  | 0.00 | 0.23***     | 0.01 | 0.21***  | 0.01 | 0.21***     | 0.01 | 0.26***  | 0.01 | 0.26***     | 0.01 |
| Upwardly mobile                     | 0.57***  | 0.01 | 0.57***     | 0.01 | 0.60***  | 0.01 | 0.60***     | 0.01 | 0.55***  | 0.01 | 0.55***     | 0.01 |
| Bisexual × Downwardly mobile        | 1.37     | 0.51 |             |      | 0.61     | 0.65 |             |      | 1.30*    | 0.52 |             |      |
| Bisexual × Upwardly mobile          | 1.44     | 0.32 |             |      | 1.49     | 0.54 |             |      | 1.48     | 0.44 |             |      |
| Gay/Lesbian × Downwardly mobile     |          |      | 1.24        | 0.19 |          |      | 1.03        | 0.23 |          |      | 1.49***     | 0.34 |
| Gay/Lesbian × Upwardly mobile       |          |      | 1.71***     | 0.17 |          |      | 2.17***     | 0.33 |          |      | 1.44**      | 0.20 |
| BIC Model                           | 9792.93  |      | 9925.66     |      | 4621.3   |      | 4687.0      |      | 5116.05  |      | 5167.8      |      |
| BIC Model without interaction       | 9788.97  |      | 9948.16     |      | 4617.2   |      | 4708.2      |      | 5112.34  |      | 5157.2      |      |

**Table H2c.** Log-linear models explaining the frequency of upward and downward mobility (Germany)

|                                     | Overall  |      |             |      | Men      |             | Women    |      |             |      |         |      |
|-------------------------------------|----------|------|-------------|------|----------|-------------|----------|------|-------------|------|---------|------|
|                                     | Bisexual |      | Gay/Lesbian |      | Bisexual | Gay/Lesbian | Bisexual |      | Gay/Lesbian |      |         |      |
|                                     | IRR      | SE   | IRR         | SE   | IRR      | SE          | IRR      | SE   | IRR         | SE   |         |      |
| Parental Education (Ref. ISCED 5-6) |          |      |             |      |          |             |          |      |             |      |         |      |
| ISCED 3-4                           | 2.54***  | 0.04 | 2.54***     | 0.04 | 2.24***  | 0.05        | 2.24***  | 0.05 | 2.79***     | 0.05 | 2.79*** | 0.05 |
| ISCED 1-2                           | 0.40***  | 0.01 | 0.40***     | 0.01 | 0.35***  | 0.01        | 0.35***  | 0.01 | 0.45***     | 0.01 | 0.45*** | 0.01 |
| Bisexual (Ref. Heterosexual)        | 0.01***  | 0.00 |             |      | 0.01***  | 0.00        |          |      |             |      |         |      |
| Gay/Lesbian (Ref. Heterosexual)     |          |      | 0.02***     | 0.00 |          |             | 0.02***  | 0.01 | 0.02***     | 0.00 | 0.01*** | 0.00 |
| Bisexual × Parental ISCED 3-4       | 0.83     | 0.11 |             |      | 0.90     | 0.19        |          |      |             |      |         |      |
| Bisexual × Parental ISCED 1-2       | 0.57**   | 0.12 |             |      | 0.49     | 0.20        |          |      |             |      |         |      |
| Gay/Lesbian × Parental ISCED 3-4    |          |      | 0.73*       | 0.09 |          |             | 0.91     | 0.14 | 0.77        | 0.12 | 0.56**  | 0.11 |
| Gay/Lesbian × Parental ISCED 1-2    |          |      | 0.41**      | 0.08 |          |             | 0.44**   | 0.11 | 0.58*       | 0.18 | 0.40**  | 0.12 |
| <i>Mobility (Ref. Immobile)</i>     |          |      |             |      |          |             |          |      |             |      |         |      |
| Downwardly mobile                   | 0.18***  | 0.00 | 0.18***     | 0.00 | 0.16***  | 0.00        | 0.16***  | 0.00 | 0.20***     | 0.00 | 0.20*** | 0.00 |
| Upwardly mobile                     | 0.67***  | 0.01 | 0.67***     | 0.01 | 0.86***  | 0.02        | 0.86***  | 0.01 | 0.52***     | 0.01 | 0.52*** | 0.01 |
| Bisexual × Downwardly mobile        | 1.38*    | 0.19 |             |      | 1.70*    | 0.40        |          |      | 1.20        | 0.21 |         |      |
| Bisexual × Upwardly mobile          | 0.91     | 0.11 |             |      | 0.76     | 0.17        |          |      | 1.11        | 0.17 |         |      |
| Gay/Lesbian × Downwardly mobile     |          |      | 0.91        | 0.13 |          |             | 1.02     | 0.19 |             |      | 0.83    | 0.20 |
| Gay/Lesbian × Upwardly mobile       |          |      | 1.42**      | 0.15 |          |             | 1.06     | 0.14 |             |      | 1.91*** | 0.33 |
| BIC Model                           | 5347.1   |      | 5508.6      |      | 2034.1   |             | 2045.54  |      | 2785.05     |      | 2766.37 |      |
| BIC Model without interaction       | 5531.0   |      | 5514.4      |      | 2035.8   |             | 2039.98  |      | 2780.62     |      | 2776.82 |      |

**Table H2d.** Log-linear models explaining the frequency of upward and downward mobility (UK)

|                                     | Overall  |      |             |      | Men      |      |             |      | Women    |      |             |      |
|-------------------------------------|----------|------|-------------|------|----------|------|-------------|------|----------|------|-------------|------|
|                                     | Bisexual |      | Gay/Lesbian |      | Bisexual |      | Gay/Lesbian |      | Bisexual |      | Gay/Lesbian |      |
|                                     | IRR      | SE   | IRR         | SE   | IRR      | SE   | IRR         | SE   | IRR      | SE   | IRR         | SE   |
| Parental Education (Ref. ISCED 5-6) |          |      |             |      |          |      |             |      |          |      |             |      |
| ISCED 3-4                           | 3.17***  | 0.05 | 3.17***     | 0.05 | 3.21***  | 0.08 | 3.21***     | 0.08 | 3.14***  | 0.07 | 3.13***     | 0.07 |
| ISCED 1-2                           | 1.67***  | 0.03 | 1.67***     | 0.03 | 1.80***  | 0.05 | 1.80***     | 0.05 | 1.58***  | 0.04 | 1.58***     | 0.04 |
| Bisexual (Ref. Heterosexual)        | 0.02***  | 0.00 |             |      | 0.02***  | 0.00 |             |      | 0.02***  | 0.00 |             |      |
| Gay/Lesbian (Ref. Heterosexual)     |          |      | 0.02***     | 0.00 |          |      | 0.02***     | 0.00 |          |      | 0.02***     | 0.00 |
| Bisexual × Parental ISCED 3-4       | 0.46***  | 0.06 |             |      | 0.46***  | 0.10 |             |      | 0.46***  | 0.08 |             |      |
| Bisexual × Parental ISCED 1-2       | 0.26***  | 0.05 |             |      | 0.31***  | 0.08 |             |      | 0.22***  | 0.05 |             |      |
| Gay/Lesbian × Parental ISCED 3-4    |          |      | 0.55***     | 0.07 |          |      | 0.65***     | 0.12 |          |      | 0.46***     | 0.08 |
| Gay/Lesbian × Parental ISCED 1-2    |          |      | 0.32***     | 0.05 |          |      | 0.42***     | 0.09 |          |      | 0.21***     | 0.05 |
| <i>Mobility (Ref. Immobile)</i>     |          |      |             |      |          |      |             |      |          |      |             |      |
| Downwardly mobile                   | 0.33***  | 0.01 | 0.33***     | 0.01 | 0.36***  | 0.01 | 0.36***     | 0.01 | 0.31***  | 0.01 | 0.31***     | 0.01 |
| Upwardly mobile                     | 0.84***  | 0.01 | 0.84***     | 0.01 | 0.79***  | 0.01 | 0.79***     | 0.01 | 0.87***  | 0.01 | 0.87***     | 0.01 |
| Bisexual × Downwardly mobile        | 0.86     | 0.13 |             |      | 0.89     | 0.21 |             |      | 0.85     | 0.17 |             |      |
| Bisexual × Upwardly mobile          | 1.17     | 0.14 |             |      | 1.41     | 0.27 |             |      | 1.00     | 0.17 |             |      |
| Gay/Lesbian × Downwardly mobile     |          |      | 0.87        | 0.12 |          |      | 0.77        | 0.16 |          |      | 0.97        | 0.19 |
| Gay/Lesbian × Upwardly mobile       |          |      | 1.79***     | 0.18 |          |      | 1.92***     | 0.26 |          |      | 1.68***     | 0.26 |
| BIC Model                           | 3001.01  |      | 3025.20     |      | 879.35   |      | 885.73      |      | 1211.15  |      | 1225.56     |      |
| BIC Model without interaction       | 2996.93  |      | 3056.86     |      | 877.68   |      | 910.23      |      | 1206.56  |      | 1232.13     |      |

**Table H2e.** Log-linear models explaining the frequency of upward and downward mobility (US)

|                                     | Overall  |      |             |      | Men      |      | Women       |      |          |      |             |      |
|-------------------------------------|----------|------|-------------|------|----------|------|-------------|------|----------|------|-------------|------|
|                                     | Bisexual |      | Gay/Lesbian |      | Bisexual | SE   | Gay/Lesbian |      | Bisexual |      | Gay/Lesbian |      |
|                                     | IRR      | SE   | IRR         | SE   |          |      | IRR         | SE   | IRR      | SE   | IRR         | SE   |
| Parental Education (Ref. ISCED 5-6) |          |      |             |      |          |      |             |      |          |      |             |      |
| ISCED 3-4                           | 1.76***  | 0.05 | 1.76***     | 0.05 | 1.71***  | 0.06 | 1.71***     | 0.06 | 1.80***  | 0.06 | 1.80***     | 0.06 |
| ISCED 1-2                           | 0.43***  | 0.01 | 0.43***     | 0.01 | 0.39***  | 0.02 | 0.39***     | 0.02 | 0.47***  | 0.02 | 0.47***     | 0.02 |
| Bisexual (Ref. Heterosexual)        | 0.04***  | 0.00 |             |      | 0.02***  | 0.00 |             |      | 0.05***  | 0.01 |             |      |
| Gay/Lesbian (Ref. Heterosexual)     |          |      | 0.03***     | 0.00 |          |      | 0.03***     | 0.01 |          |      | 0.02***     | 0.01 |
| Bisexual × Parental ISCED 3-4       | 0.62***  | 0.09 |             |      | 0.64     | 0.18 |             |      | 0.63***  | 0.11 |             |      |
| Bisexual × Parental ISCED 1-2       | 0.48***  | 0.11 |             |      | 0.68     | 0.27 |             |      | 0.40***  | 0.11 |             |      |
| Gay/Lesbian × Parental ISCED 3-4    |          |      | 0.59***     | 0.10 |          |      | 0.47**      | 0.11 |          |      | 0.77**      | 0.20 |
| Gay/Lesbian × Parental ISCED 1-2    |          |      | 0.40***     | 0.11 |          |      | 0.32**      | 0.12 |          |      | 0.60**      | 0.29 |
| <i>Mobility (Ref. Immobile)</i>     |          |      |             |      |          |      |             |      |          |      |             |      |
| Downwardly mobile                   | 0.17***  | 0.01 | 0.17***     | 0.01 | 0.19***  | 0.01 | 0.19***     | 0.01 | 0.16***  | 0.01 | 0.16***     | 0.01 |
| Upwardly mobile                     | 0.63***  | 0.02 | 0.63***     | 0.02 | 0.60***  | 0.02 | 0.60***     | 0.02 | 0.65***  | 0.02 | 0.65***     | 0.02 |
| Bisexual × Downwardly mobile        | 1.66**   | 0.28 |             |      | 1.68     | 0.56 |             |      | 1.57*    | 0.30 |             |      |
| Bisexual × Upwardly mobile          | 0.90     | 0.15 |             |      | 1.07     | 0.33 |             |      | 0.81     | 0.16 |             |      |
| Gay/Lesbian × Downwardly mobile     |          |      | 1.69*       | 0.36 |          |      | 1.98*       | 0.55 |          |      | 1.33        | 0.44 |
| Gay/Lesbian × Upwardly mobile       |          |      | 1.79**      | 0.32 |          |      | 2.59***     | 0.63 |          |      | 1.14        | 0.32 |
| BIC Model                           | 3788.20  |      | 3683.21     |      | 1605.56  |      | 1622.16     |      | 2043.32  |      | 1961.79     |      |
| BIC Model without interaction       | 3790.85  |      | 3689.72     |      | 1602.11  |      | 1634.35     |      | 2044.49  |      | 1957.03     |      |

Notes: \*  $p < 0.05$ . These analyses are based on Poisson models predicting frequencies of cells in three-way tabulation of sexual identity, own and parental education. We ran three models for each country separately: one for the whole sample, one for men, and one for women. These models are not based on matched samples. Data from 2012, 2016 and 2020 for HILDA (Australia), 2017 for CASEN (Chile), 2016 and 2019 for SOEP (Germany), 2011/2012 and 2017/2018 for UK-HLS (UK), and 2008-2018 for the GSS (US). IRR: = Incidence Rate Ratio; SE = Standard Error; ISCED = International Standard Classification of Education; BIC = Bayesian Information Criterion.

### *Online Appendix I. Additional models explaining educational attainment*

Examining educational mobility may help us understand the educational advantage of gay men and lesbian women observed in Figures 2 and 3 and documented in earlier research for the US (Mittleman, 2022). To generate these insights, Table I1 shows several models comparing college attainment between gay/lesbian and heterosexual individuals in the five countries under consideration.

Two key observations can be made based on this analysis. First, the estimated effect of parental education on respondent's educational attainment is weaker among gay/lesbian than heterosexual people. Although interaction effects are occasionally not statistically significant, the overall pattern of results lends support to the proposition that the intergenerational transmission of educational advantage is weaker among gay/lesbian individuals (i.e., that mobility is greater for this group).

Second, the educational advantage observed for gay/lesbian people is primarily driven by their higher levels of upward mobility. Gay and lesbian individuals' educational premium is greater among those with lower-educated parents compared to those with higher-educated parents (in both cases, this is relative to heterosexual individuals with similarly educated parents). For instance, in Chile, Germany and the UK, the educational advantage of gay/lesbian individuals fades entirely for individuals with highly educated parents.

Additional analyses indicated that the estimated effect of identifying as gay/lesbian on educational attainment for individuals with highly educated parents was not statistically significant in Chile, Germany, the UK or the US (effects were larger and significant in Australia). In short, we only find firm evidence that gay/lesbian people are more highly educated than heterosexual people for individuals who come from lower educational backgrounds. This suggests that explanations for the observed educational differences between heterosexual and gay/lesbian individuals should focus on explaining why gay/lesbian individuals with lower-educated parents are more likely to be upwardly mobile, rather than on factors that may explain an overall educational premium for gay/lesbian people across the board.

**Table 11.** Results from linear probability models based on matched samples explaining college attainment

|                                     | Australia    |      | Chile        |      | Germany      |      | UK           |      | US           |      |
|-------------------------------------|--------------|------|--------------|------|--------------|------|--------------|------|--------------|------|
|                                     | <i>Coef.</i> | SE   |
| Panel 1: Pooled sample              |              |      |              |      |              |      |              |      |              |      |
| Gay/Lesbian                         | 0.18***      | 0.04 | 0.04*        | 0.02 | 0.09**       | 0.03 | 0.15***      | 0.03 | 0.12**       | 0.04 |
| Parent(s) college educated          | 0.33***      | 0.01 | 0.46***      | 0.01 | 0.35***      | 0.01 | 0.34***      | 0.01 | 0.39***      | 0.02 |
| Gay/Lesbian × Parent(s) college ed. | -0.07        | 0.06 | -0.05        | 0.05 | -0.09        | 0.06 | -0.14*       | 0.06 | -0.06        | 0.08 |
| Constant                            | 0.32***      | 0.01 | 0.20***      | 0.00 | 0.34***      | 0.00 | 0.38***      | 0.00 | 0.22         | 0.01 |
| Panel 2: Men                        |              |      |              |      |              |      |              |      |              |      |
| Gay/Lesbian                         | 0.17**       | 0.05 | 0.08*        | 0.03 | 0.03         | 0.04 | 0.15***      | 0.04 | 0.20**       | 0.06 |
| Parent(s) college educated          | 0.30***      | 0.02 | 0.44***      | 0.01 | 0.31***      | 0.01 | 0.34***      | 0.02 | 0.38***      | 0.03 |
| Gay/Lesbian × Parent(s) college ed. | -0.01        | 0.08 | -0.08        | 0.07 | -0.04        | 0.08 | -0.08        | 0.09 | -0.21†       | 0.11 |
| Constant                            | 0.31***      | 0.01 | 0.22***      | 0.00 | 0.38***      | 0.01 | 0.36***      | 0.00 | 0.22***      | 0.01 |
| Panel 3: Women                      |              |      |              |      |              |      |              |      |              |      |
| Gay/Lesbian                         | 0.19**       | 0.06 | 0.02         | 0.03 | 0.17***      | 0.05 | 0.14**       | 0.05 | 0.02         | 0.06 |
| Parent(s) college educated          | 0.34***      | 0.01 | 0.46***      | 0.01 | 0.42***      | 0.01 | 0.34***      | 0.01 | 0.40***      | 0.03 |
| Gay/Lesbian × Parent(s) college ed. | -0.13        | 0.08 | -0.04        | 0.09 | -0.16†       | 0.09 | -0.19*       | 0.08 | 0.14         | 0.11 |
| Constant                            | 0.40***      | 0.01 | 0.18***      | 0.00 | 0.26***      | 0.01 | 0.42***      | 0.01 | 0.25***      | 0.01 |

Notes: Linear probability model coefficients (95% Confidence Intervals) based on coarsened exact matching. Matching variables: age, ethno-migrant background, parental education, gender. Data from 2012, 2016 and 2020 for HILDA (Australia), 2017 for CASEN (Chile), 2016 and 2019 for SOEP (Germany), 2011/2012 and 2017/2018 for UK-HLS (UK), and 2008-2018 for the GSS (US). SE: Standard error. \*\*\*  $p < 0.001$ ; \*\*  $p < 0.01$ ; \*  $p < 0.05$ ; †  $p < 0.10$ .



**Table I2.** Results from linear probability models based on matched samples explaining college attainment

|                                  | Australia          |      | Chile             |      | Germany      |      | UK           |      | US           |      |
|----------------------------------|--------------------|------|-------------------|------|--------------|------|--------------|------|--------------|------|
|                                  | <i>Coef.</i>       | SE   | <i>Coef.</i>      | SE   | <i>Coef.</i> | SE   | <i>Coef.</i> | SE   | <i>Coef.</i> | SE   |
| <b>Men</b>                       |                    |      |                   |      |              |      |              |      |              |      |
| Bisexual                         | -0.04              | 0.06 | 0.04              | 0.07 | -0.07        | 0.05 | 0.05         | 0.05 | 0.10         | 0.08 |
| Parent(s) college educated       | 0.28***            | 0.02 | 0.44***           | 0.02 | 0.32***      | 0.01 | 0.32***      | 0.02 | 0.29***      | 0.05 |
| Bisexual × Parent(s) college ed. | -0.06              | 0.10 | 0.23 <sup>†</sup> | 0.13 | -0.06        | 0.11 | 0.04         | 0.09 | 0.02         | 0.14 |
| Constant                         | 0.33***            | 0.01 | 0.18***           | 0.00 | 0.39***      | 0.01 | 0.37***      | 0.01 | 0.26***      | 0.03 |
| <b>Women</b>                     |                    |      |                   |      |              |      |              |      |              |      |
| Bisexual                         | -0.07 <sup>†</sup> | 0.04 | 0.15*             | 0.07 | 0.01         | 0.03 | -0.06        | 0.04 | 0.01         | 0.05 |
| Parent(s) college educated       | 0.31***            | 0.02 | 0.45***           | 0.02 | 0.41***      | 0.01 | 0.33***      | 0.01 | 0.38***      | 0.03 |
| Bisexual × Parent(s) college ed. | -0.06              | 0.06 | -0.13             | 0.13 | 0.13         | 0.07 | 0.06         | 0.08 | 0.03         | 0.09 |
| Constant                         | 0.40***            | 0.01 | 0.19***           | 0.00 | 0.26***      | 0.01 | 0.43***      | 0.01 | 0.23***      | 0.02 |

*Notes:* Linear probability model coefficients (95% Confidence Intervals) based on coarsened exact matching. Matching variables: age, country of birth/ethnicity, parental education, gender. Data from 2012, 2016 and 2020 for HILDA (Australia), 2017 for CASEN (Chile), 2016 and 2019 for SOEP (Germany), 2011/2012 and 2017/2018 for UK-HLS (UK), and 2008-2018 for the GSS (US). SE: Standard error. \*\*\*  $p < 0.001$ ; \*\*  $p < 0.01$ ; \*  $p < 0.05$ ; <sup>†</sup>  $p < 0.10$ .

## References

- Aksoy, C. G., Carpenter, C. S., & Frank, J. (2018). Sexual orientation and earnings: new evidence from the United Kingdom. *ILR Review*, 71(1), 242-272.
- Elliott, M. N., Dahlhamer, J. M., MacCarthy, S., Beckett, M. K., Orr, N., Guerino, P., ... & Martino, S. C. (2019). Using ancillary sociodemographic data to identify sexual minority adults among those responding “Something Else” or “Don’t Know” to sexual orientation questions. *Medical Care*, 57(12), e87.
- Goldberg, S. K., Rothblum, E. D., Russell, S. T., & Meyer, I. H. (2020). Exploring the Q in LGBTQ: Demographic characteristic and sexuality of queer people in a US representative sample of sexual minorities. *Psychology of Sexual Orientation and Gender Diversity*, 7(1), 101.
- Kühne, S., Kroh, M., & Richter, D. (2019). Comparing self-reported and partnership-inferred sexual orientation in household surveys. *Journal of Official Statistics*, 35(4), 777-805.
- Mittleman, J. (2022). Intersecting the academic gender gap: The education of lesbian, gay, and bisexual America. *American Sociological Review*, 87(2), 303-335.
- Mize, T. D. (2016). Sexual orientation in the labor market. *American Sociological Review*, 81(6), 1132-1160.
- Ridolfo, H., Miller, K., & Maitland, A. (2012). Measuring sexual identity using survey questionnaires: How valid are our measures?. *Sexuality Research and Social Policy*, 9(2), 113-124.
- Wooden, M. (2014). The measurement of sexual Identity in Wave 12 of the HILDA survey (and associations with mental health and earnings). *HILDA Project Discussion Paper Series*, No. 1/14, February 2014.
